# Supplementary material
Source: MDPI journal article supplement (https://www.mdpi.com/search?q=molecules-26-00059)
Supplement: s001 [file molecules-26-00059-s001.pdf]

# Antimalarials and Phytotoxins from *Botryosphaeria dothidea* identified from a Seed of Diseased *Torreya taxifolia*

Mallika Kumarihamy <sup>1,2,\*</sup>, Luiz H. Rosa <sup>3</sup>, Natascha Techen <sup>1</sup>, Daneel Ferreira <sup>2</sup>, Edward M. Croom, Jr. <sup>2</sup>, Stephen O. Duke <sup>4,†</sup>, Babu L. Tekwani <sup>1,‡</sup>, Shabana Khan <sup>1,2</sup> and N. P. Dhammika Nanayakkara <sup>1,\*</sup>

<sup>1</sup> National Center for Natural Products Research, Research Institute of Pharmaceutical Sciences, School of Pharmacy, The University of Mississippi, University, MS 38677, USA; ntechen@olemiss.edu (N.T.); btekwani@southernresearch.org (B.L.T.); skhan@olemiss.edu (S.K.)

<sup>2</sup> Division of Pharmacognosy, Department of BioMolecular Sciences, School of Pharmacy, The University of Mississippi, University, MS 38677, USA; dferreir@olemiss.edu (D.F.); emcroom@olemiss.edu (E.M.C.J.)

<sup>3</sup> Departamento de Microbiologia, Universidade Federal de Minas Gerais, Belo Horizonte, MG, Brazil; lhrosa@icb.ufmg.br

<sup>4</sup> Natural Products Utilization Research Unit, USDA-ARS, University, MS 38677, USA; sduke@olemiss.edu

\* Correspondance: mkumarih@olemiss.edu (M.K.); dhammika@olemiss.edu (N.P.D.N.); Tel.: +1-662-915-1661 (M.K.); +1-662-915-1019 (N.P.D.N.)

† Current address: National Center for Natural Products Research, Research Institute of Pharmaceutical Sciences, School of Pharmacy, The University of Mississippi, University, MS 38677, USA

‡ Current address: Department of Infectious Diseases, Division of Drug Discovery, Southern Research, Birmingham, AL 35205, USA

| Contents                                                     | Figure | Page # |
|--------------------------------------------------------------|--------|--------|
| Constructed tree using Neighbor-Joining method               | S1     | 4      |
| Constructed tree using Neighbor-Joining method               | S2     | 5      |
| <sup>1</sup> H NMR Spectrum of compound <b>1</b> & <b>2</b>  | S3     | 6      |
| <sup>13</sup> C NMR Spectrum of compound <b>1</b> & <b>2</b> | S4     | 6      |
| DEPT Spectrum of compound <b>1</b> & <b>2</b>                | S5     | 7      |
| COSY Spectrum of compound <b>1</b> & <b>2</b>                | S6     | 7      |
| HMQC Spectrum of compound <b>1</b> & <b>2</b>                | S7     | 8      |
| HMBC Spectrum of compound <b>1</b> & <b>2</b>                | S8     | 8      |
| HRMS Data of Compounds <b>1</b> & <b>2</b>                   | S9     | 9      |
| <sup>1</sup> H NMR Spectrum of compound <b>3</b>             | S10    | 10     |
| <sup>13</sup> C NMR Spectrum of compound <b>3</b>            | S11    | 10     |
| DEPT Spectrum of compound <b>3</b>                           | S12    | 11     |

|                                                   |     |    |
|---------------------------------------------------|-----|----|
| COSY Spectrum of compound <b>3</b>                | S13 | 11 |
| HMQC Spectrum of compound <b>3</b>                | S14 | 12 |
| HMBC Spectrum of compound <b>3</b>                | S15 | 12 |
| HRMS Data of Compounds <b>3</b>                   | S16 | 13 |
| <sup>1</sup> H NMR Spectrum of compound <b>4</b>  | S17 | 13 |
| <sup>13</sup> C NMR Spectrum of compound <b>4</b> | S18 | 14 |
| DEPT Spectrum of compound <b>4</b>                | S19 | 14 |
| COSY Spectrum of compound <b>4</b>                | S20 | 15 |
| ROESY Spectrum of compound <b>4</b>               | S21 | 15 |
| HMQC Spectrum of compound <b>4</b>                | S22 | 16 |
| HMBC Spectrum of compound <b>4</b>                | S23 | 16 |
| HRMS Data of Compounds <b>4</b>                   | S24 | 17 |
| <sup>1</sup> H NMR Spectrum of compound <b>7</b>  | S25 | 17 |
| <sup>13</sup> C NMR Spectrum of compound <b>7</b> | S26 | 18 |
| DEPT Spectrum of compound <b>7</b>                | S27 | 18 |
| COSY Spectrum of compound <b>7</b>                | S28 | 19 |
| HMQC Spectrum of compound <b>7</b>                | S29 | 19 |
| HMBC Spectrum of compound <b>7</b>                | S30 | 20 |
| HRMS Data of Compounds <b>7</b>                   | S31 | 20 |
| <sup>1</sup> H NMR Spectrum of compound <b>8</b>  | S32 | 21 |
| <sup>13</sup> C NMR Spectrum of compound <b>8</b> | S33 | 21 |
| DEPT Spectrum of compound <b>8</b>                | S34 | 22 |
| COSY Spectrum of compound <b>8</b>                | S35 | 22 |
| HMQC Spectrum of compound <b>8</b>                | S36 | 23 |
| HMBC Spectrum of compound <b>8</b>                | S37 | 23 |
| HRMS Data of Compounds <b>8</b>                   | S38 | 24 |

**Note;** 7 and 8 are two additional components isolated from the active fraction.

| <b>Contents</b>                                                           | <b>Table</b> | <b>Page #</b> |
|---------------------------------------------------------------------------|--------------|---------------|
| Best nineteen hits 100% sequence identity                                 | <b>S1</b>    | 25            |
| ITS sequences of taxa of the <i>Botryosphaeriaceae</i> used for alignment | <b>S2</b>    | 26 - 28       |

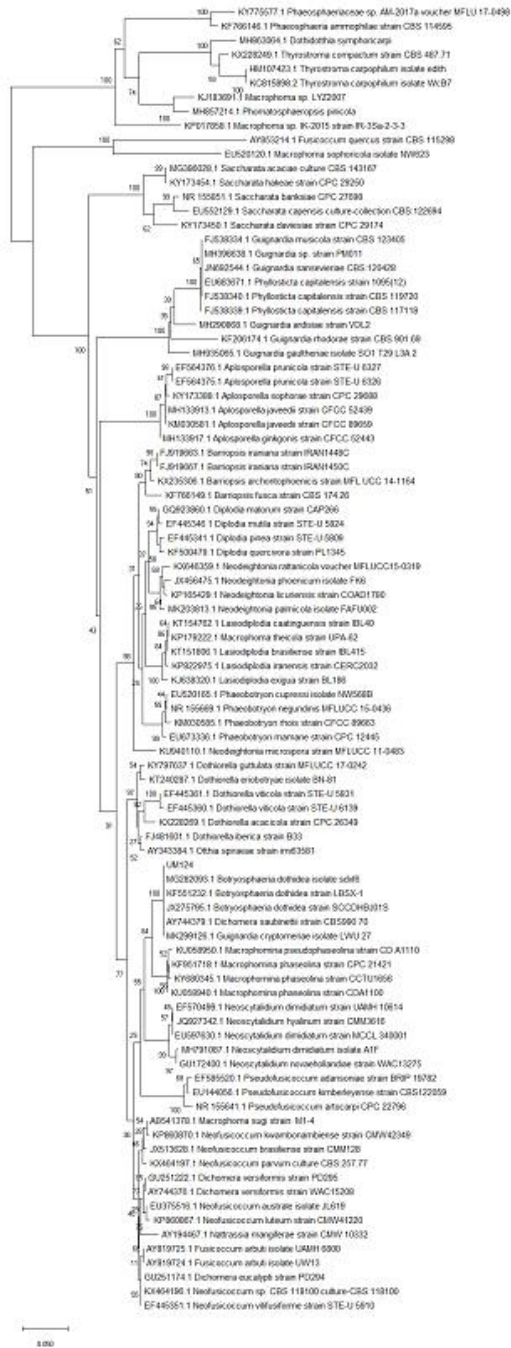

**Figure S1:** Constructed tree using Neighbor-Joining method using MEGA X software to match UM124 to already published sequences of family *Botryosphaeriaceae* taxa to help identifying close relatives. Numbers displayed on branches are the percentage of replicate trees in which the associated taxa clustered together in the bootstrap test obtained through 500 replications. Sequences used are shown with GenBank accession numbers. UM124 is closely related to *Botryosphaeria dothidea* strains.

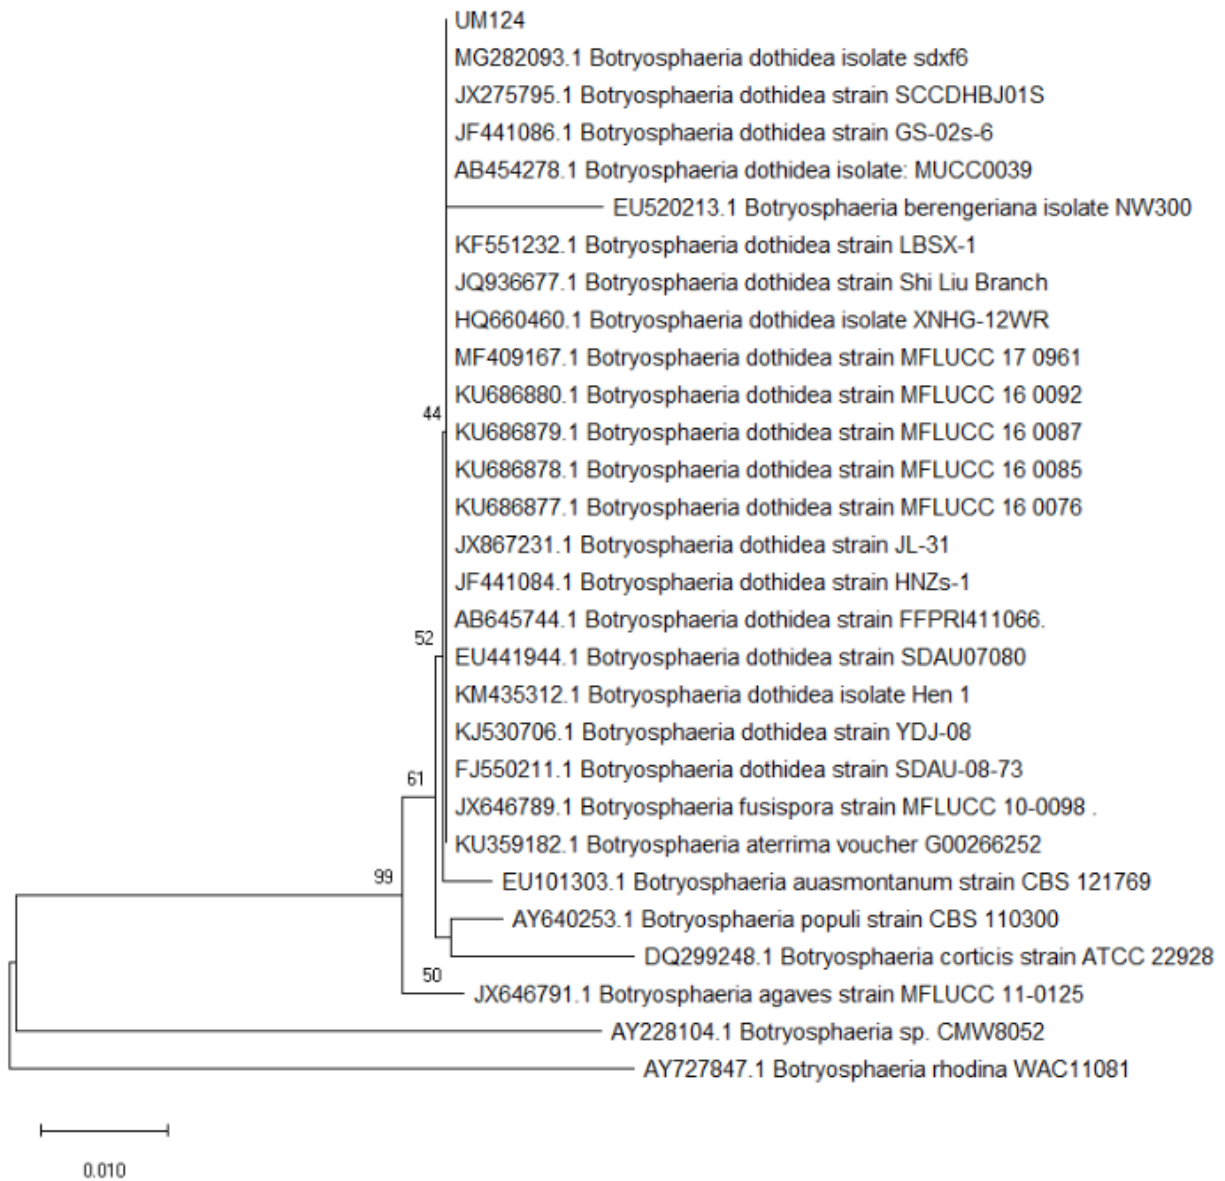

**Figure S2:** Constructed tree using Neighbor-Joining method using MEGA X software to match UM124 to already published sequences to help identifying close relatives. Numbers displayed on branches are the percentage of replicate trees in which the associated taxa clustered together in the bootstrap test obtained

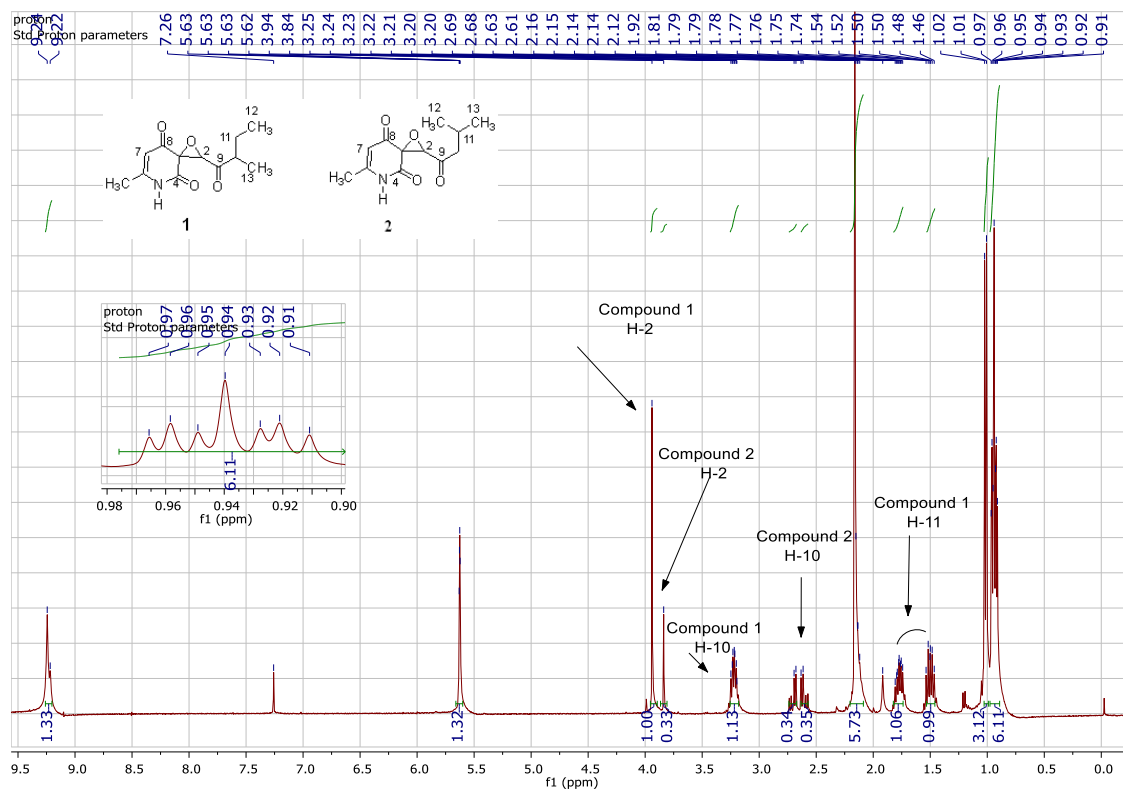

Figure S 3:  $^1\text{H}$  NMR Spectrum of compounds 1 & 2 in  $\text{CDCl}_3$

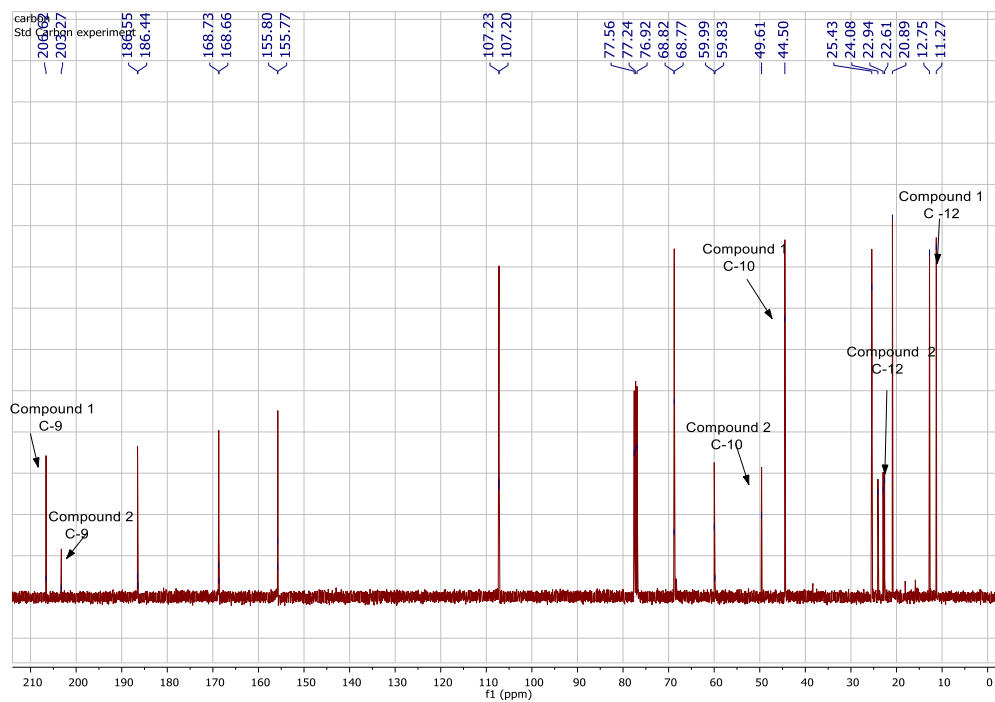

**Figure S 4:**  $^{13}\text{C}$  NMR Spectrum of compounds **1** & **2** in  $\text{CDCl}_3$

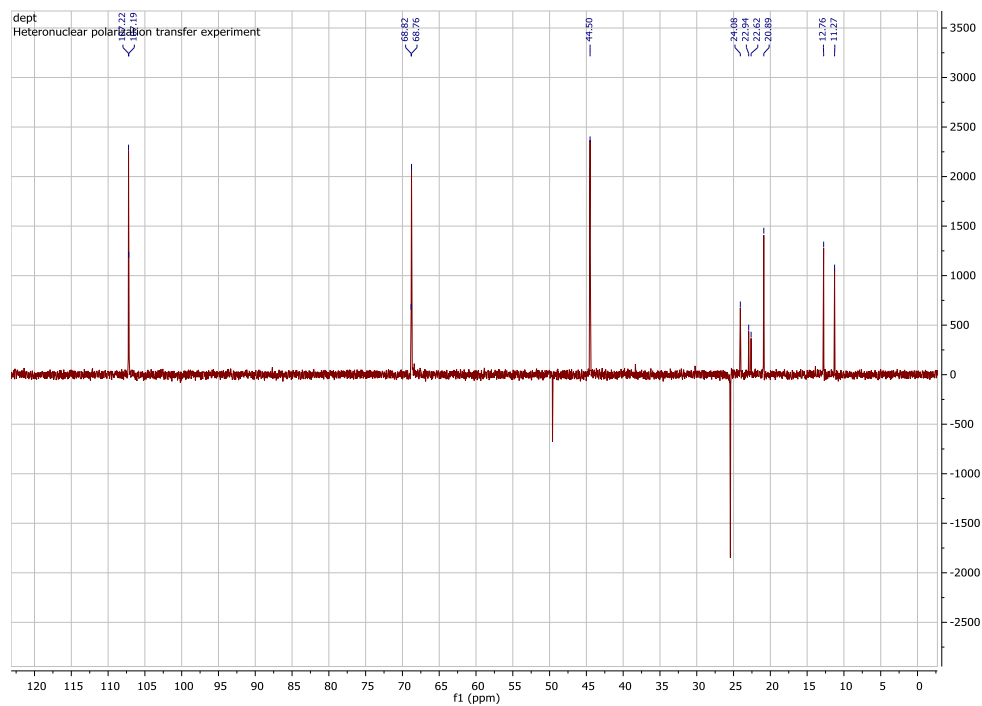

**Figure S 5:** DEPT Spectrum of compounds **1** & **2** in  $\text{CDCl}_3$

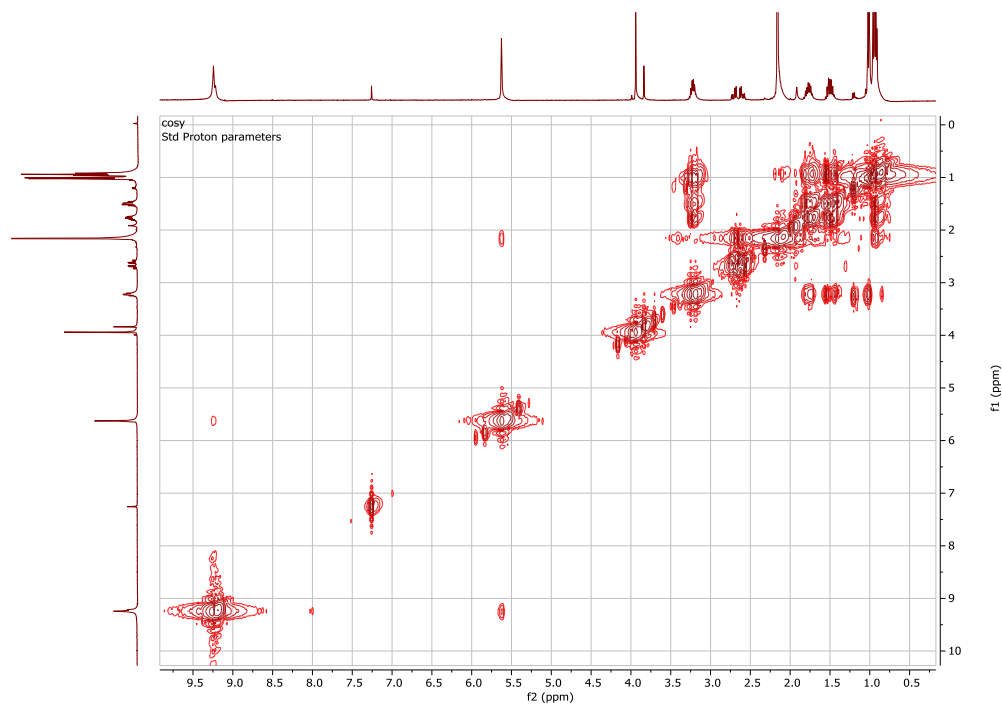

**Figure S 6:** COSY Spectrum of compounds **1** & **2** in  $\text{CDCl}_3$

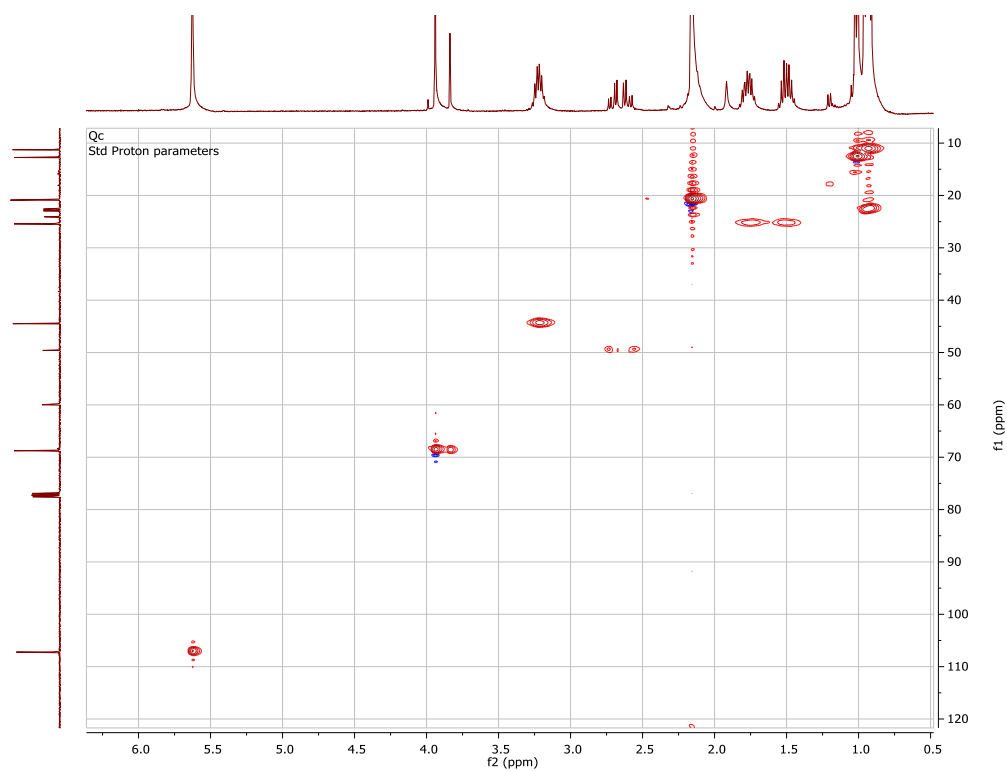

**Figure S 7:** HMQC Spectrum of compounds **1** & **2** in  $\text{CDCl}_3$

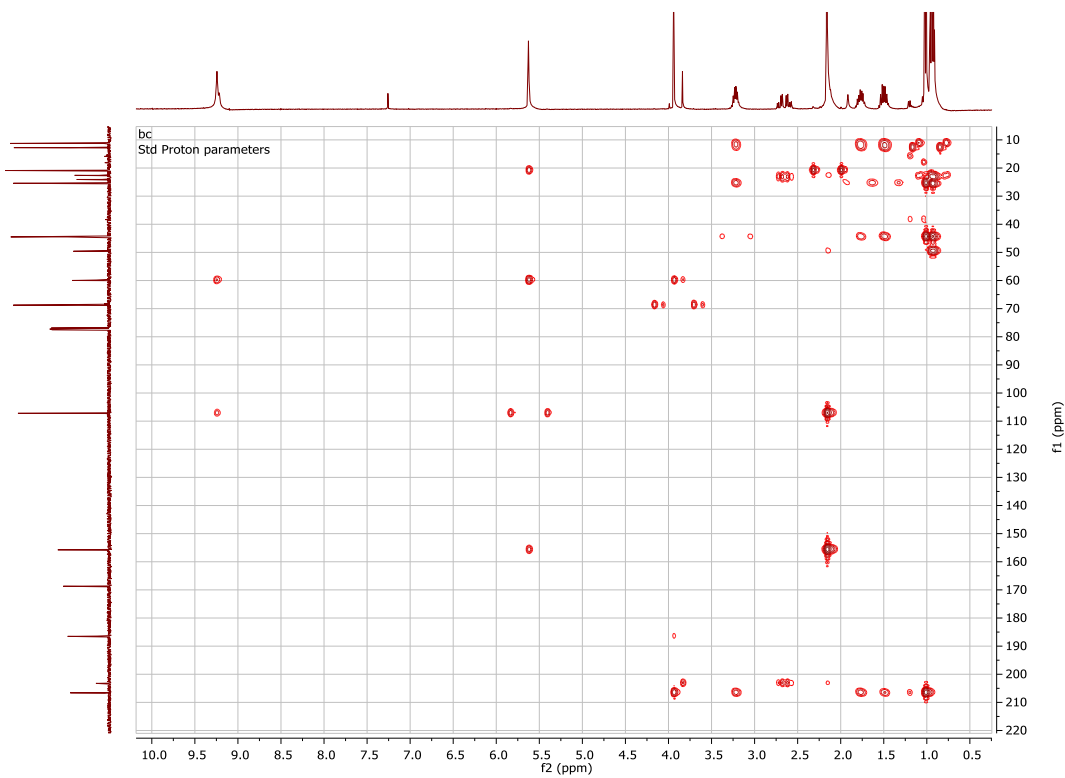

**Figure S 8:** HMBC Spectrum of compounds **1** & **2** in  $\text{CDCl}_3$



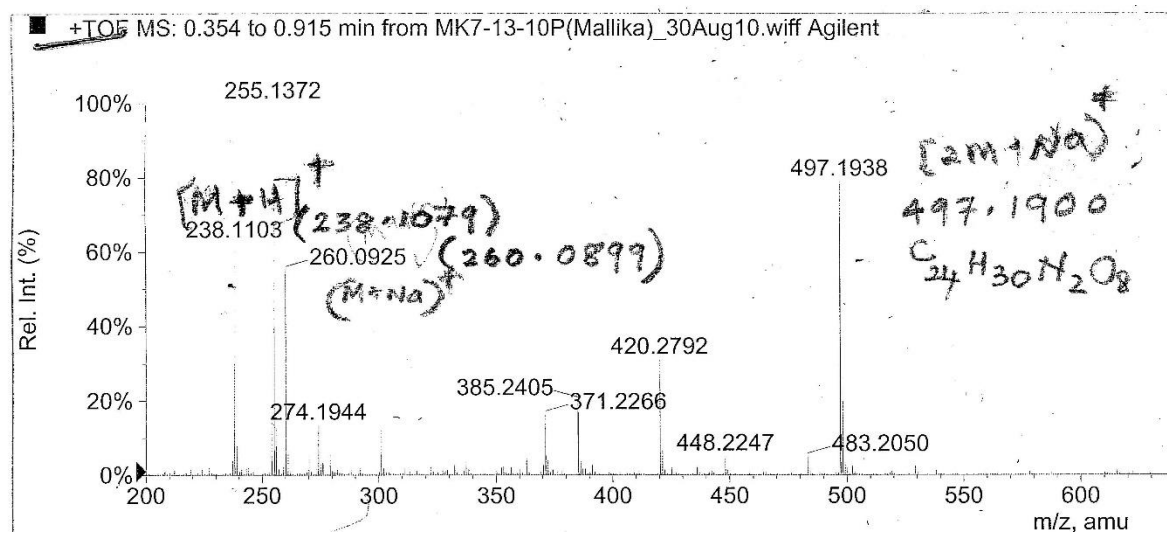

**Figure S 9: HR-MS Spectrum of compounds 1 & 2**

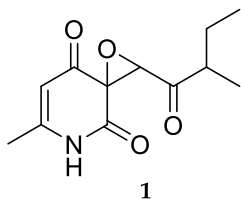

M+H

Chemical Formula:  $C_{12}H_{16}NO_4$   
Exact Mass: 238.1079

M+Na

Chemical Formula:  $C_{12}H_{15}NNaO_4$   
Exact Mass: 260.0899

2M+Na

Chemical Formula:  $C_{24}H_{30}N_2NaO_8$   
Exact Mass: 497.1900

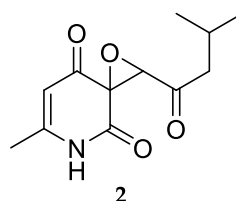

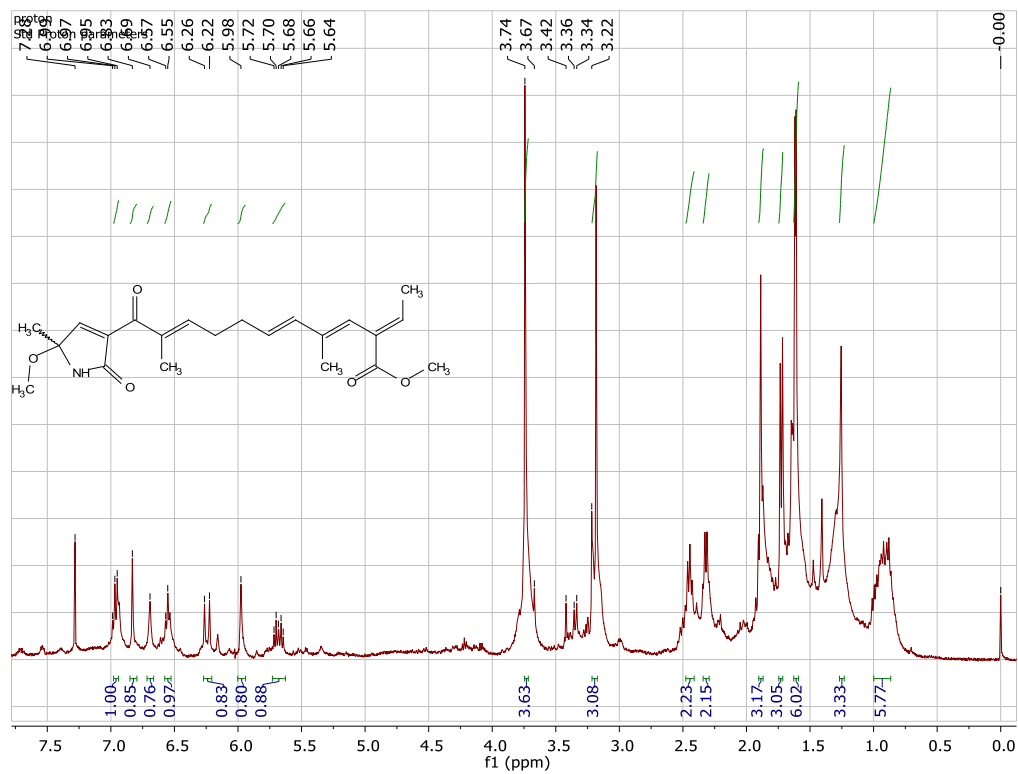

**Figure S 10: <sup>1</sup>H NMR Spectrum of compound 3 in CDCl<sub>3</sub>**

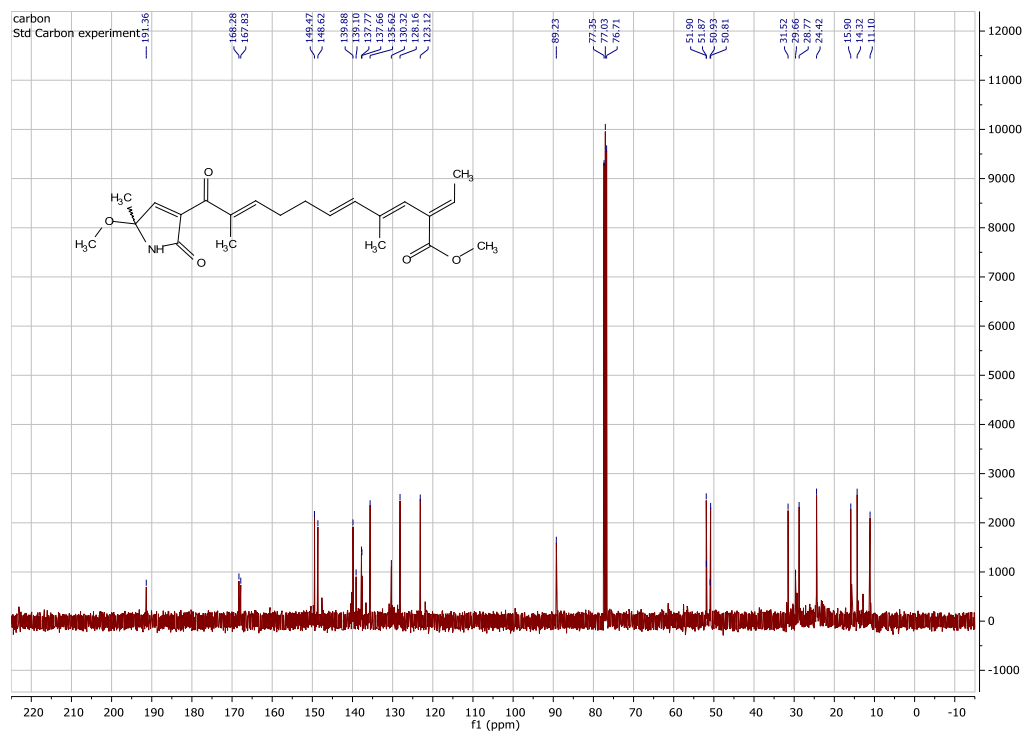

**Figure S 11: <sup>13</sup>C NMR Spectrum of compound 3 in CDCl<sub>3</sub>**

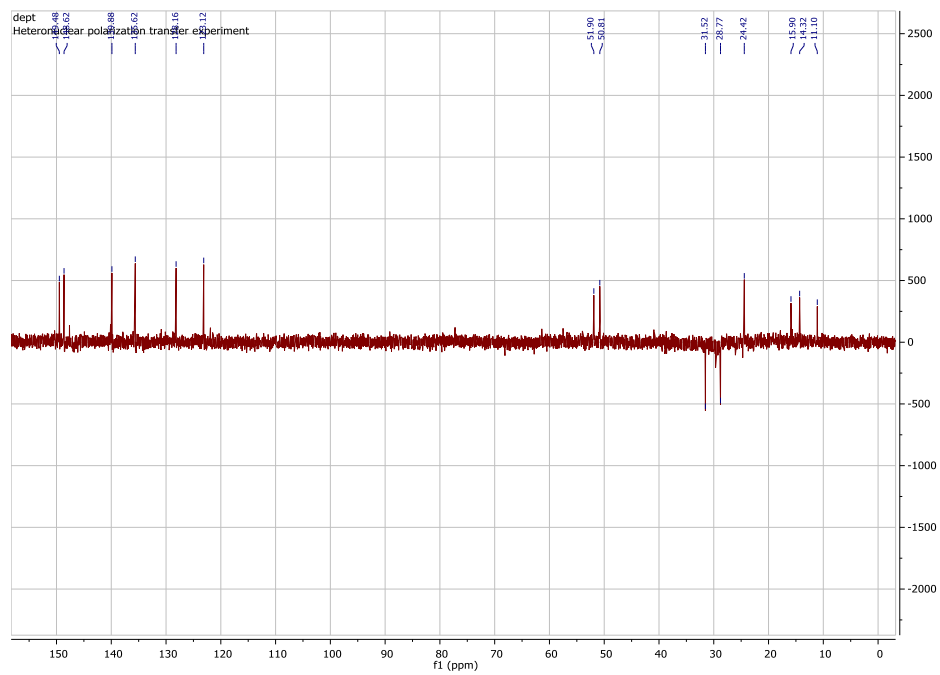

**Figure S 12:**  $^{13}\text{C}$  NMR Spectrum of compound **3** in  $\text{CDCl}_3$

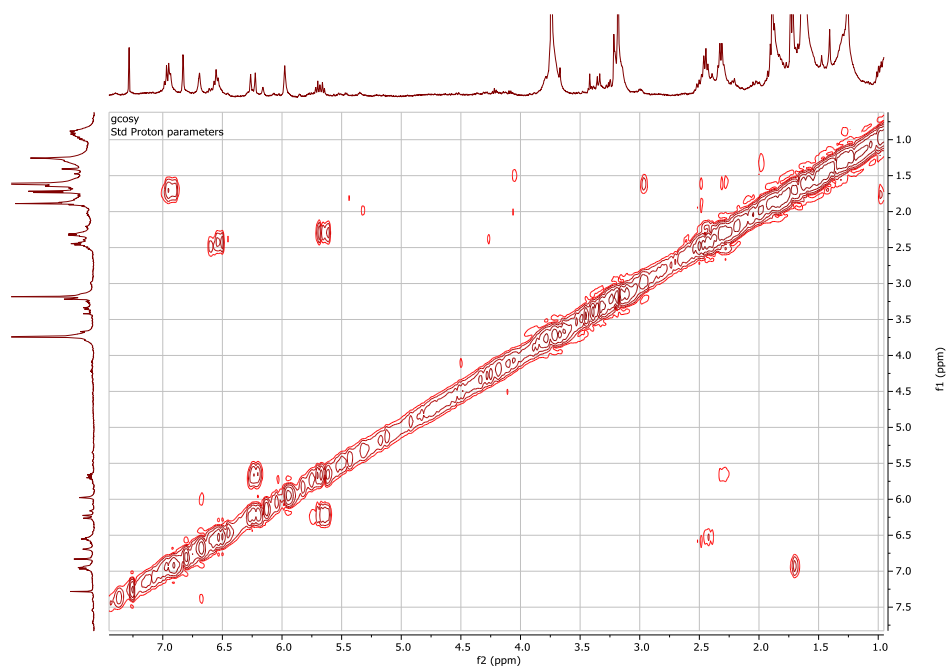

**Figure S 13:** COSY Spectrum of compound **3** in  $\text{CDCl}_3$

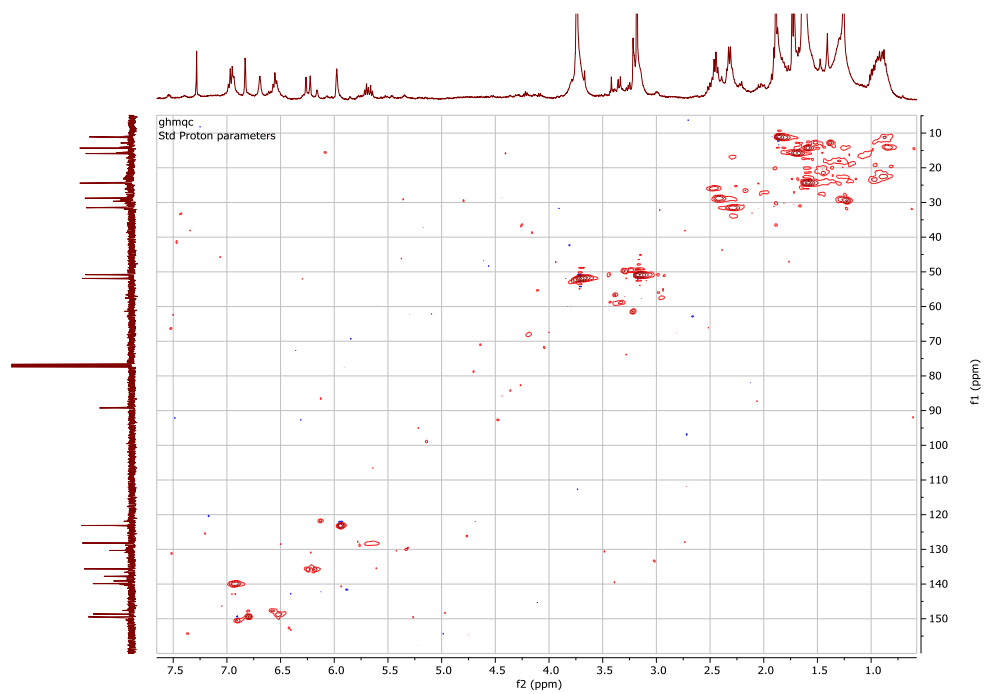

**Figure S 14:** HMQC Spectrum of compound **3** in  $\text{CDCl}_3$

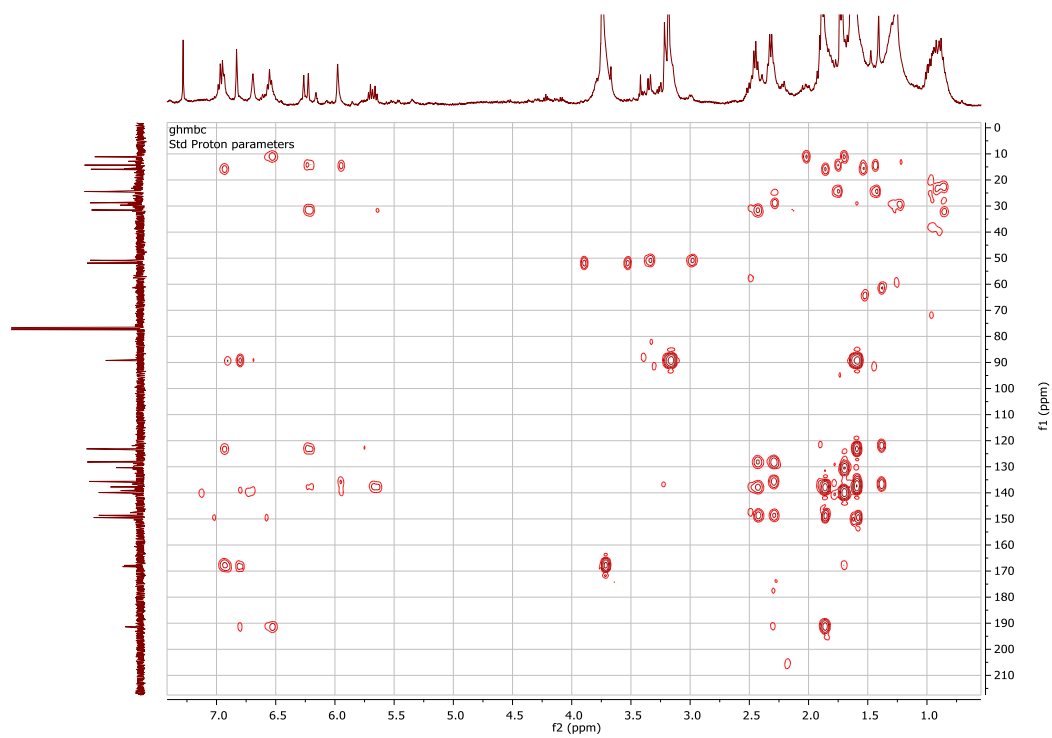

**Figure S 15:** HMBC Spectrum of compound **3** in  $\text{CDCl}_3$

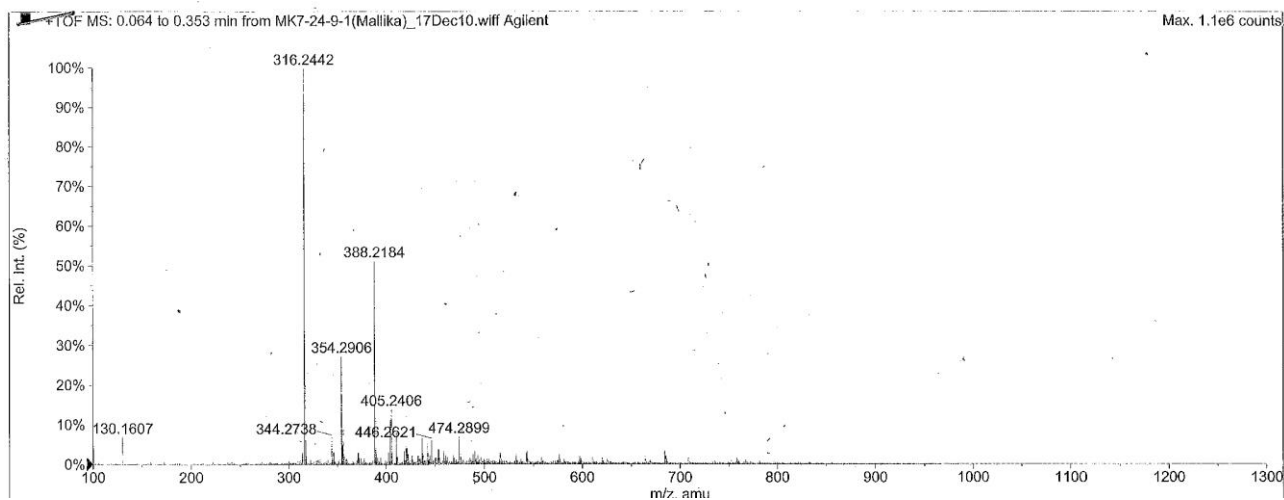

**Figure S 16: HRMS Data of Compounds 3**

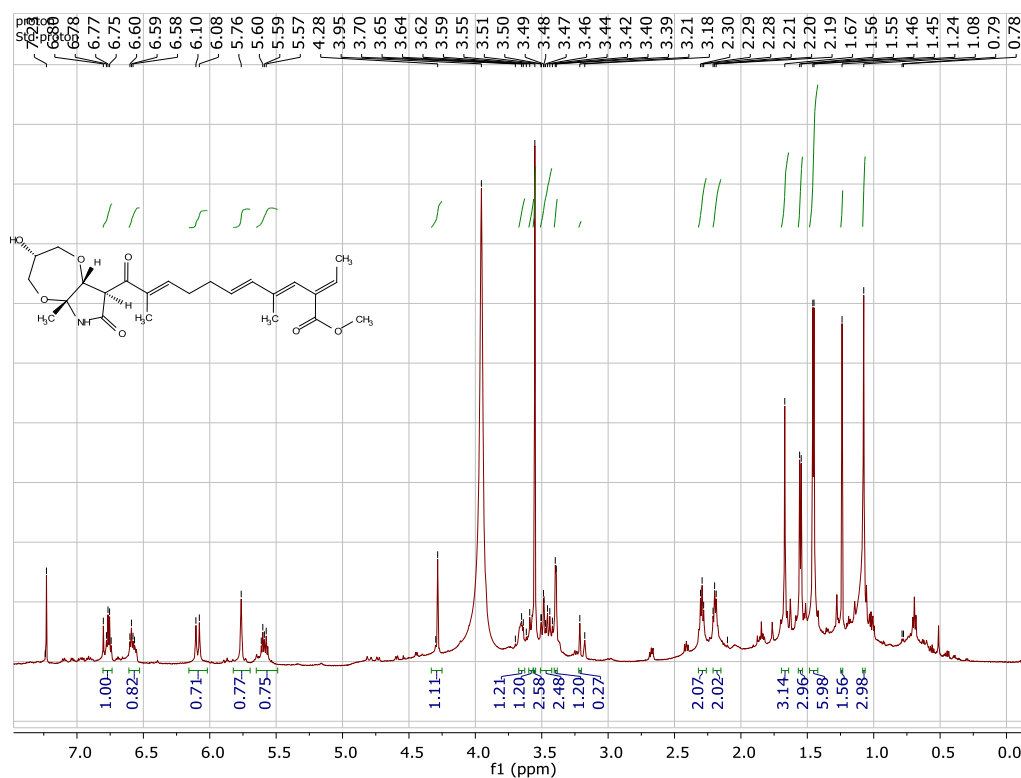

**Figure S 17: <sup>1</sup>H NMR Spectrum of compound 4 in CDCl<sub>3</sub>/methanol-*d*<sub>4</sub> (4:1)**

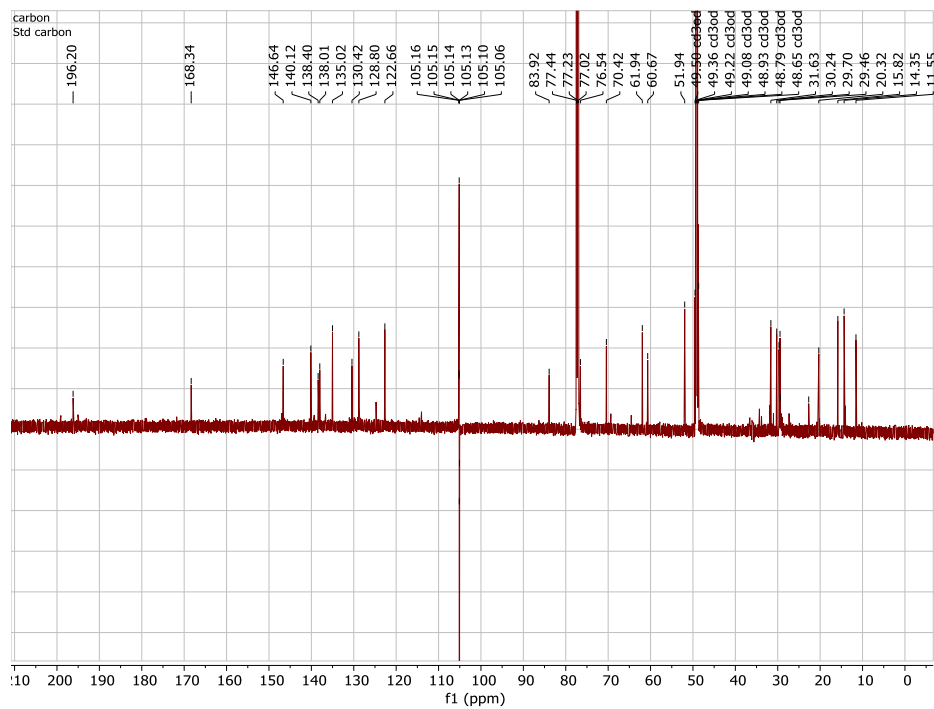

**Figure S 18:**  $^{13}\text{C}$  NMR Spectrum of compound **4** in  $\text{CDCl}_3/\text{methanol-}d_4$  (4:1)

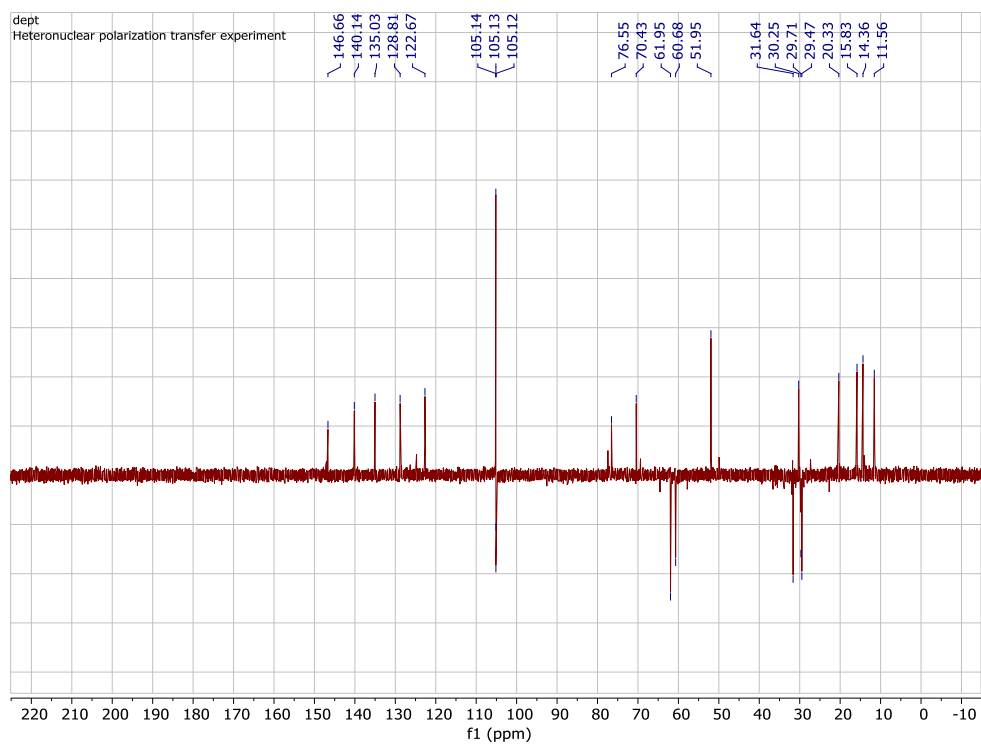

**Figure S 19:** DEPT Spectrum of compound **4** in  $\text{CDCl}_3/\text{methanol-}d_4$  (4:1)

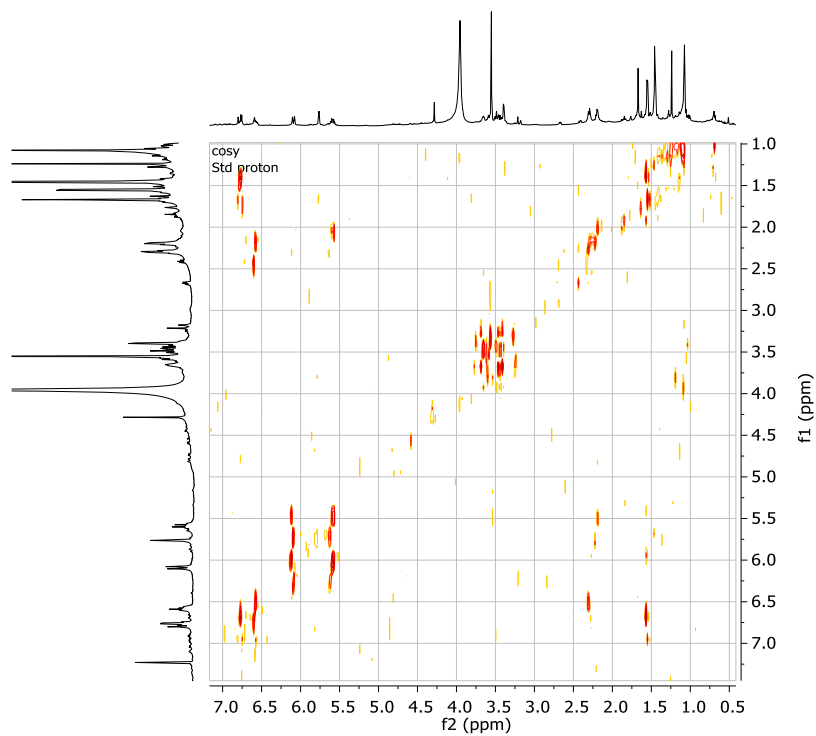

**Figure S 20:** COSY Spectrum of compound **4** in  $\text{CDCl}_3/\text{methanol-}d_4$  (4:1)

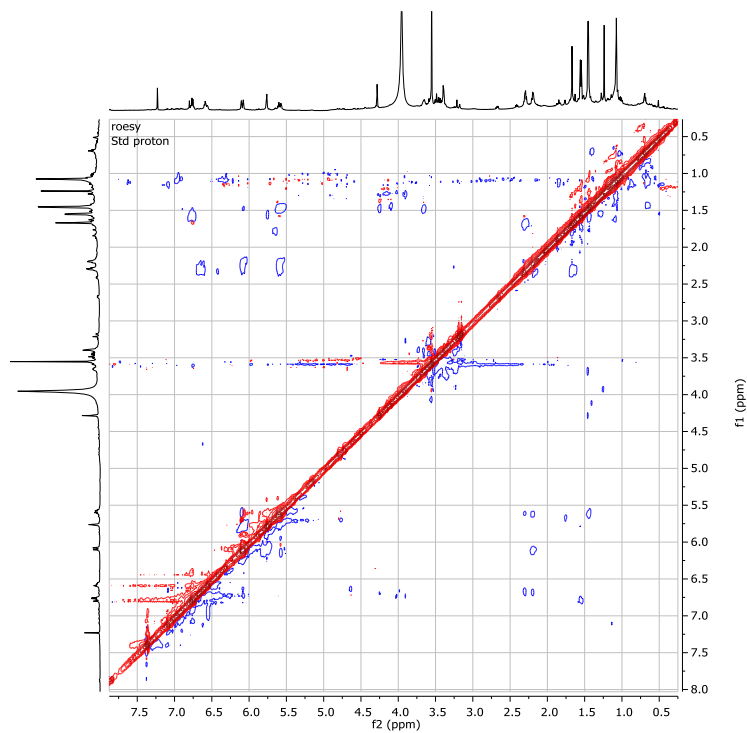

**Figure S 21:** ROESY Spectrum of compound **4** in  $\text{CDCl}_3/\text{methanol-}d_4$  (4:1)

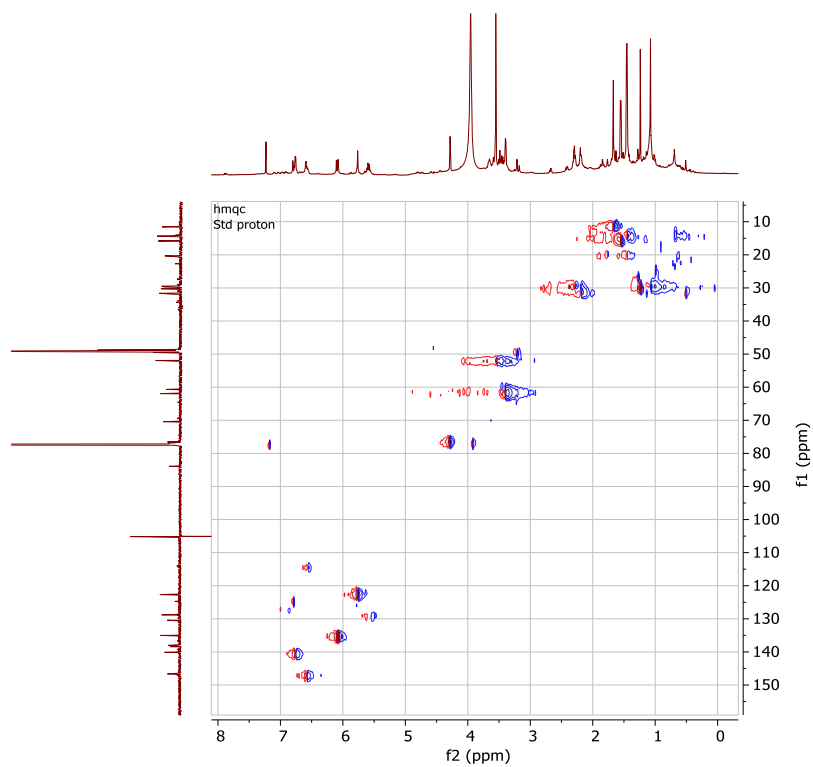

**Figure S 22:** HMQC Spectrum of compound **4** in CDCl<sub>3</sub>/methanol-*d*<sub>4</sub> (4:1)

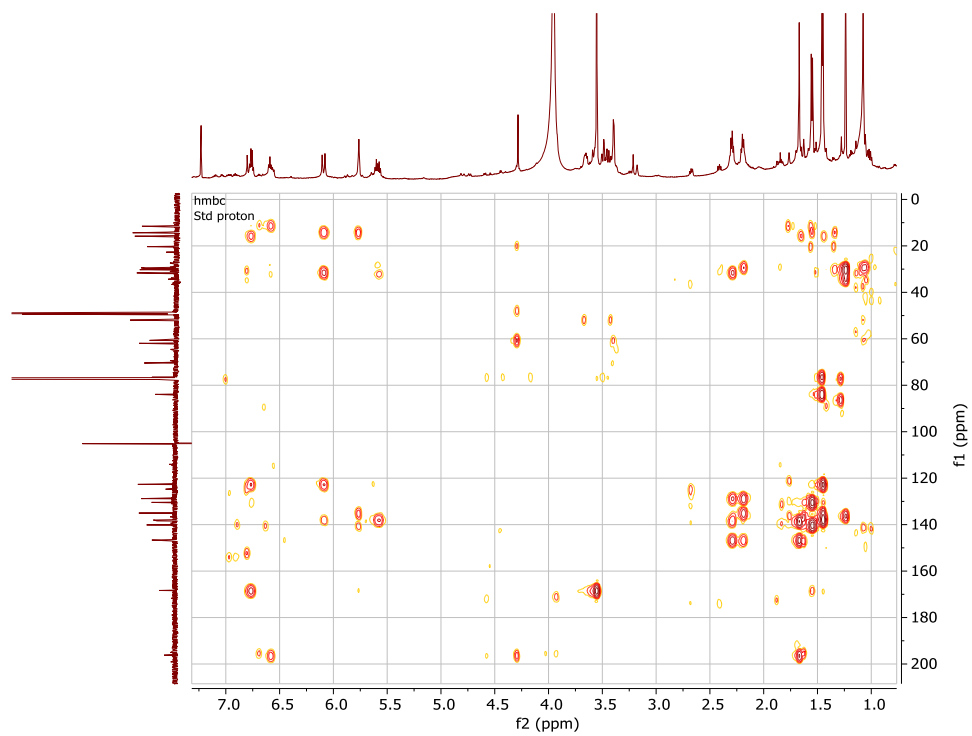

**Figure S 23:** HMBC Spectrum of compound **4** in CDCl<sub>3</sub>/methanol-*d*<sub>4</sub> (4:1)



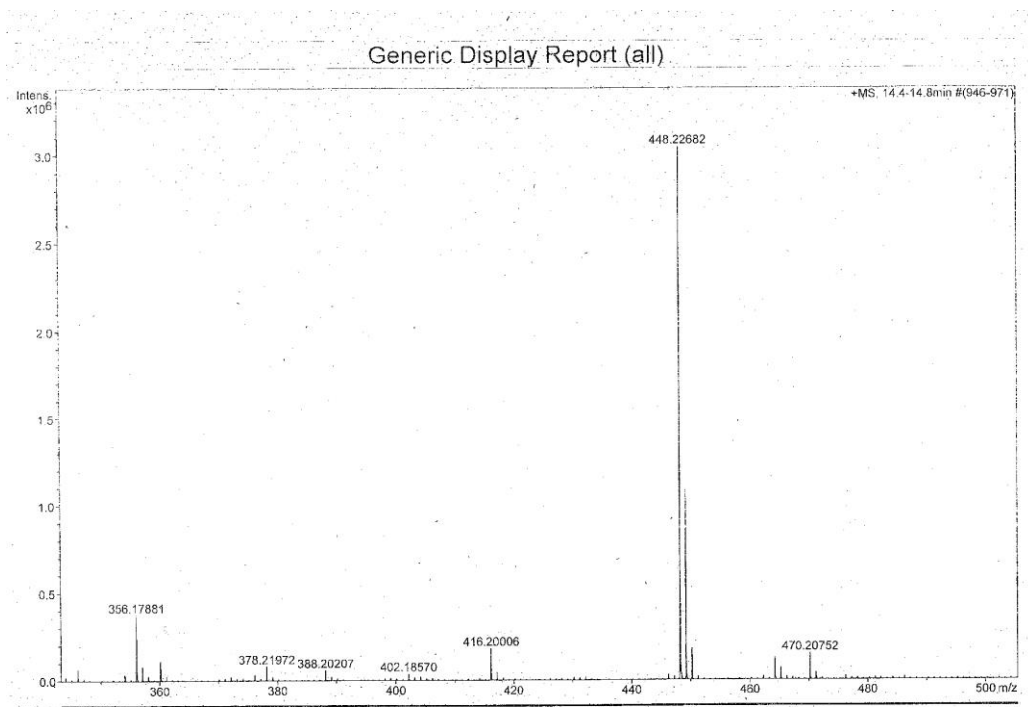

**Figure S 24: HRMS Data of Compound 4**

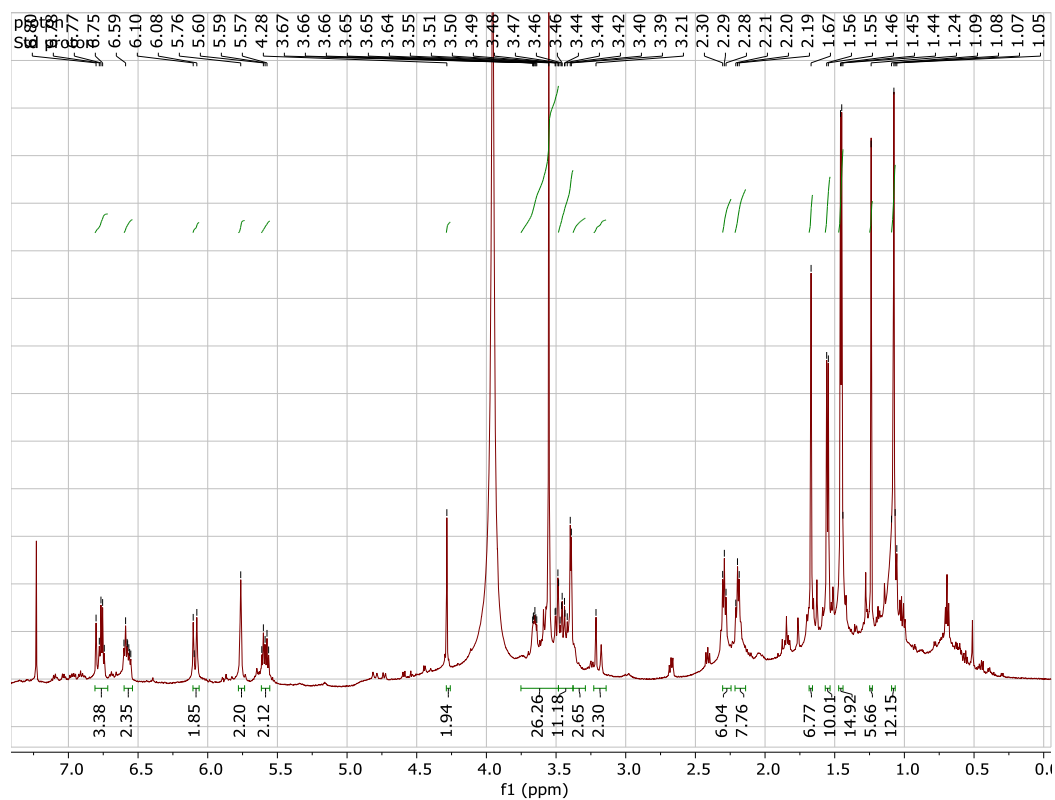

**Figure S 25: <sup>1</sup>H NMR Spectrum of compound 7 in CDCl<sub>3</sub>/methanol-*d*<sub>4</sub> (4:1)**

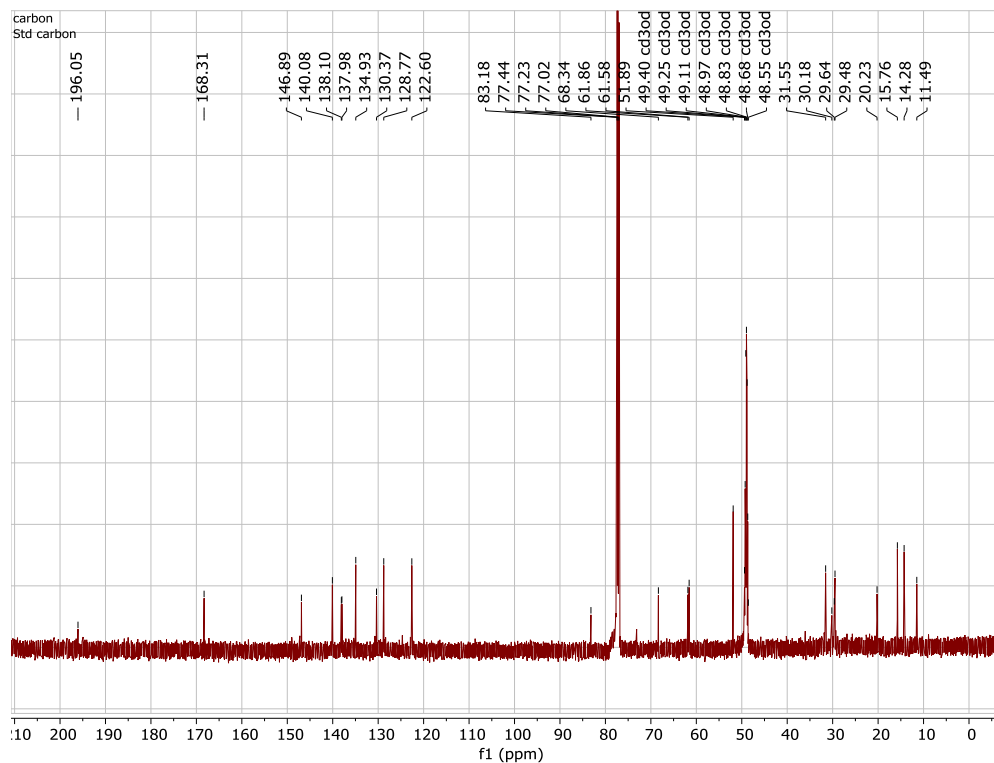

**Figure S 26:**  $^{13}\text{C}$  NMR Spectrum of compound **7** in  $\text{CDCl}_3/\text{methanol-}d_4$  (4:1)

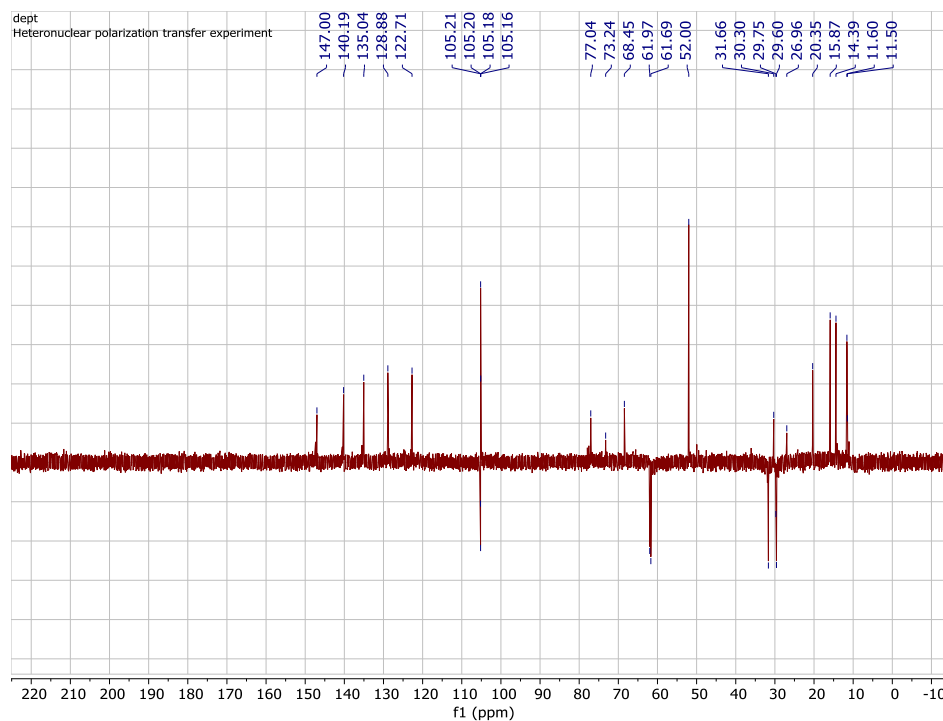

**Figure S 27:**  $^{13}\text{C}$  NMR Spectrum of compound **7** in  $\text{CDCl}_3/\text{methanol-}d_4$  (4:1)

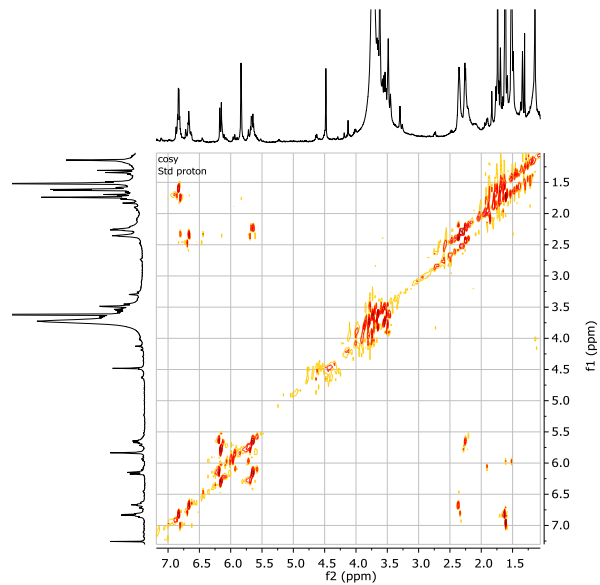

**Figure S 28:** COSY Spectrum of compound **7** in  $\text{CDCl}_3/\text{methanol-}d_4$  (4:1)

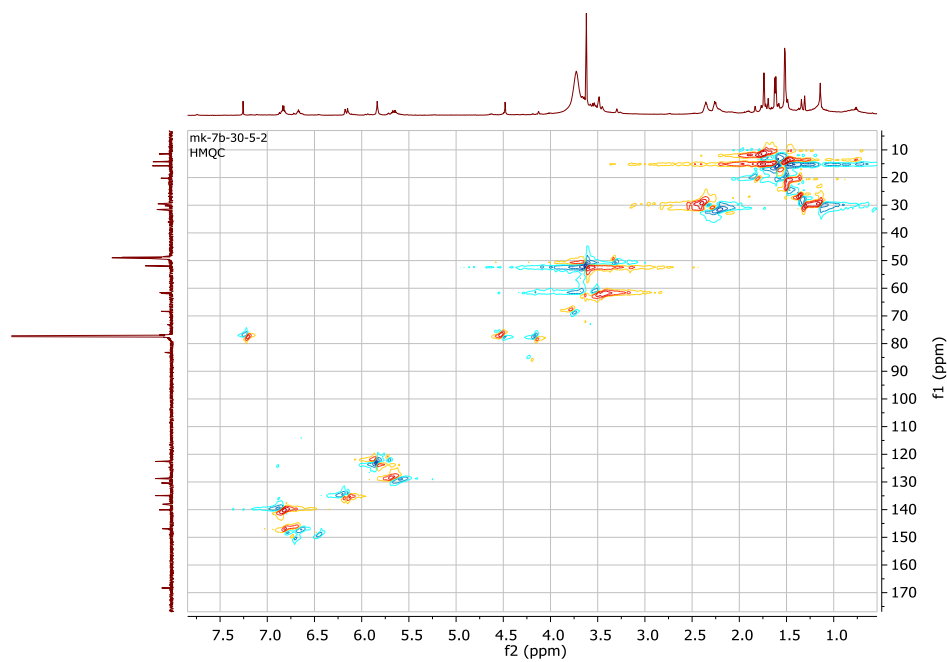

**Figure S 29:** HMBC Spectrum of compound **7** in  $\text{CDCl}_3/\text{methanol-}d_4$  (4:1)

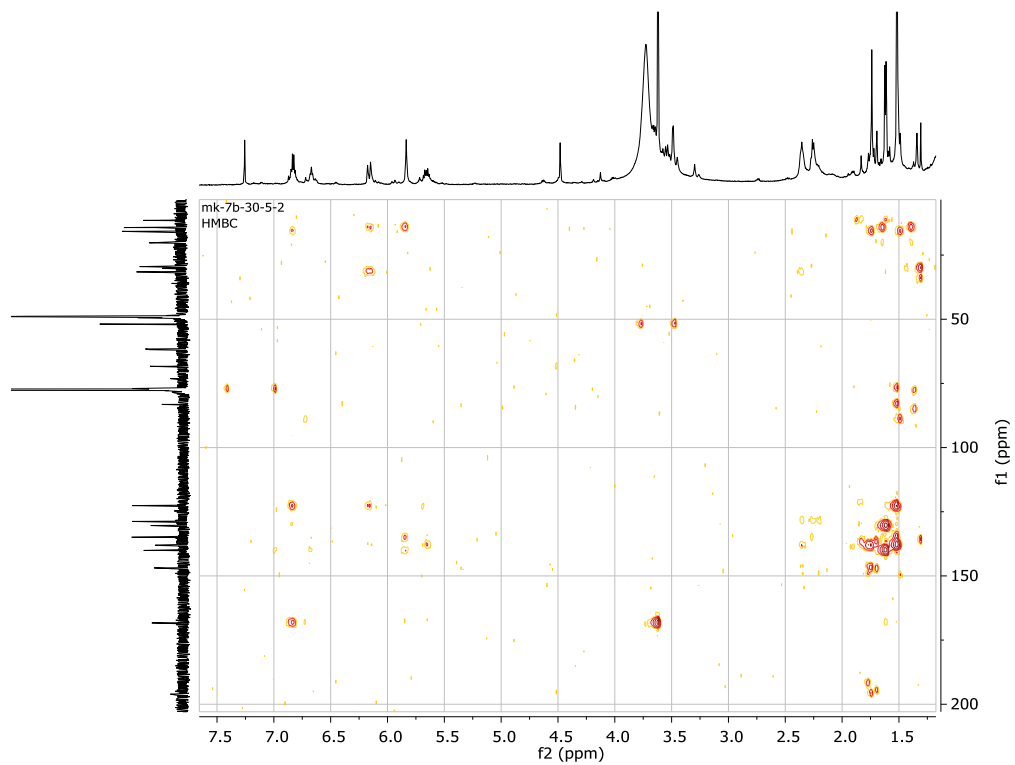

**Figure S 30:** HMBC Spectrum of compound **7** in  $\text{CDCl}_3$ /methanol- $d_4$  (4:1)

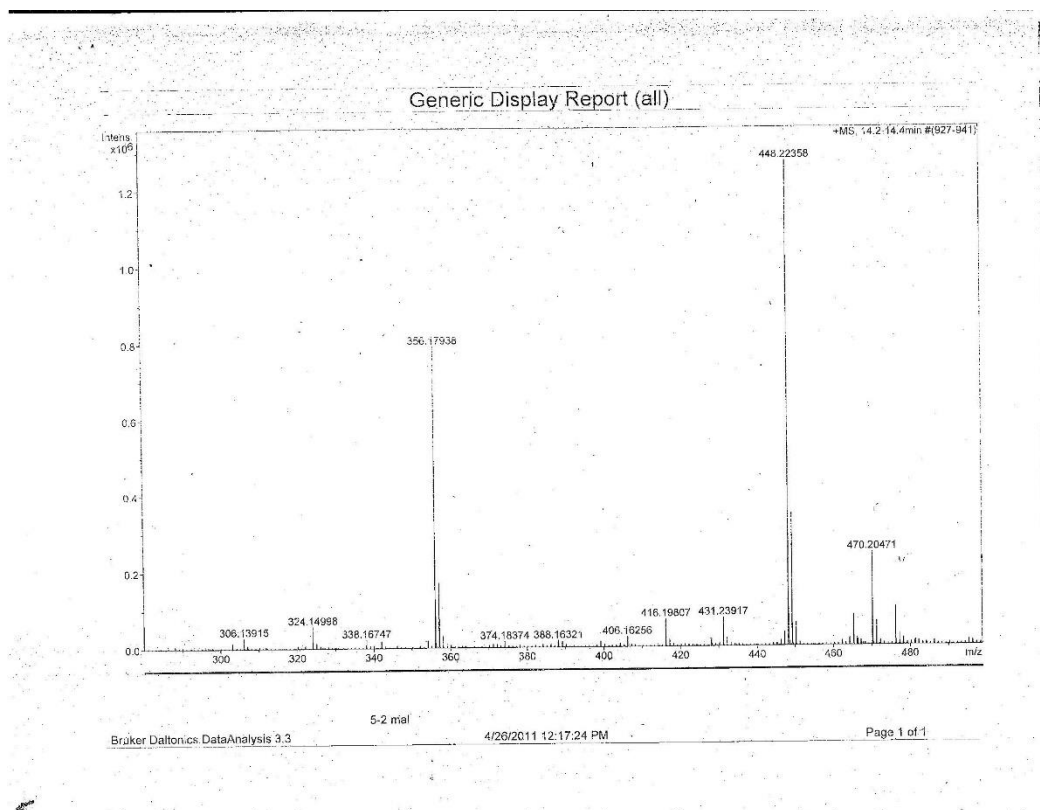

**Figure S 31:** HRMS Data of Compound **7**

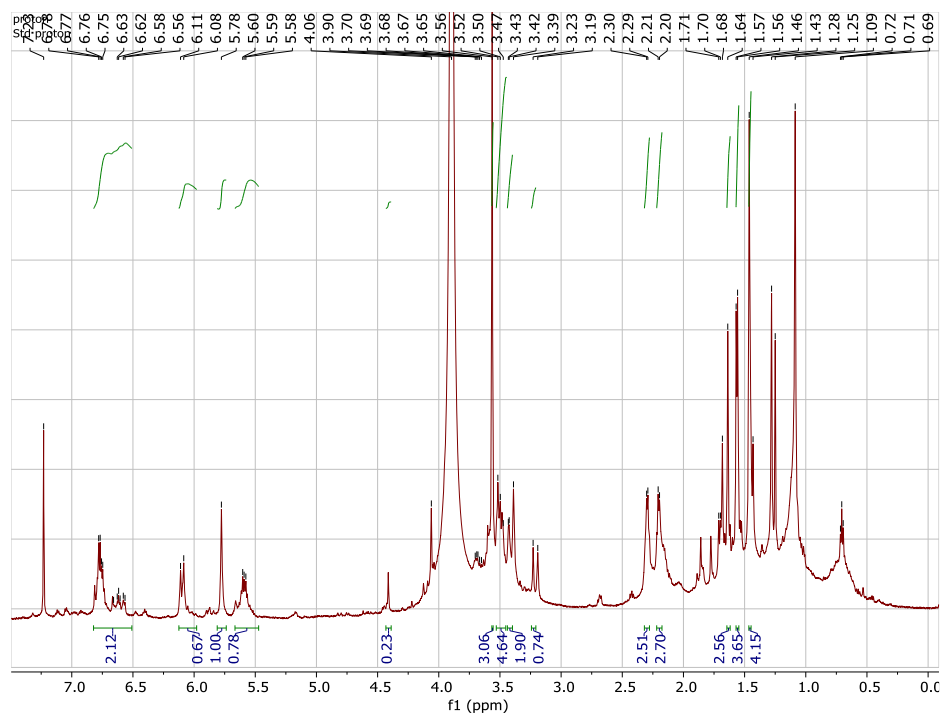

**Figure S 32:**  $^1\text{H}$  NMR Spectrum of compound **8** in  $\text{CDCl}_3/\text{methanol-}d_4$  (1:1)

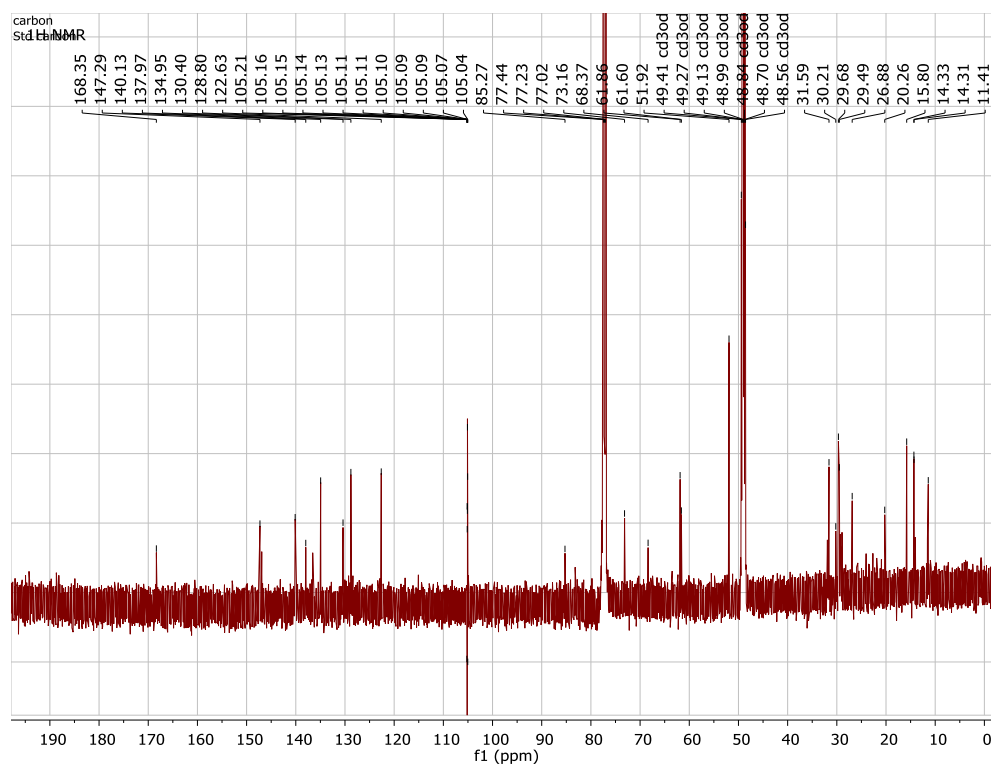

**Figure S 33:**  $^{13}\text{C}$  NMR Spectrum of compound **8** in  $\text{CDCl}_3/\text{methanol-}d_4$  (1:1)

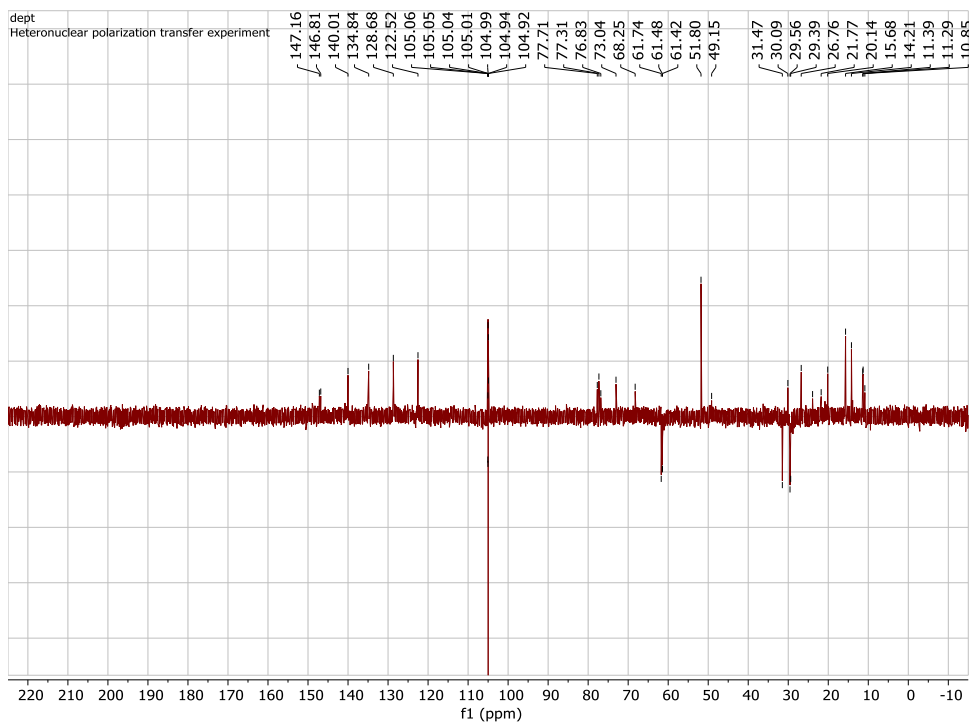

**Figure S 34:** DEPT Spectrum of compound **8** in  $\text{CDCl}_3/\text{methanol-}d_4$  (1:1)

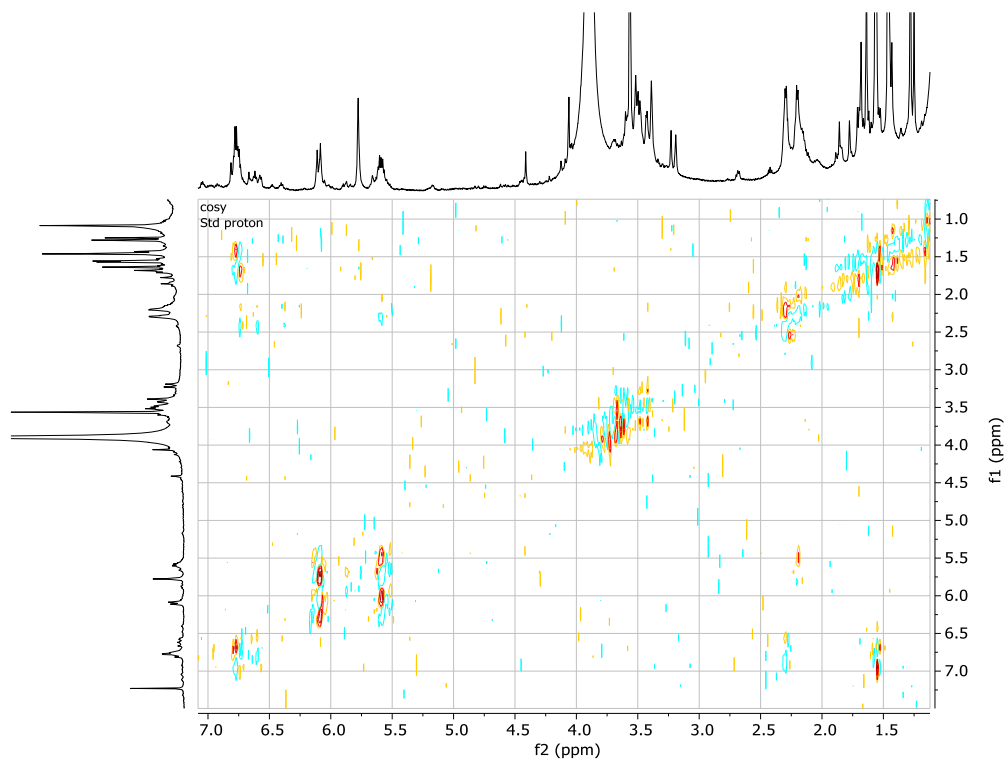

**Figure S 35:** COSY Spectrum of compound **8** in  $\text{CDCl}_3/\text{methanol-}d_4$  (1:1)

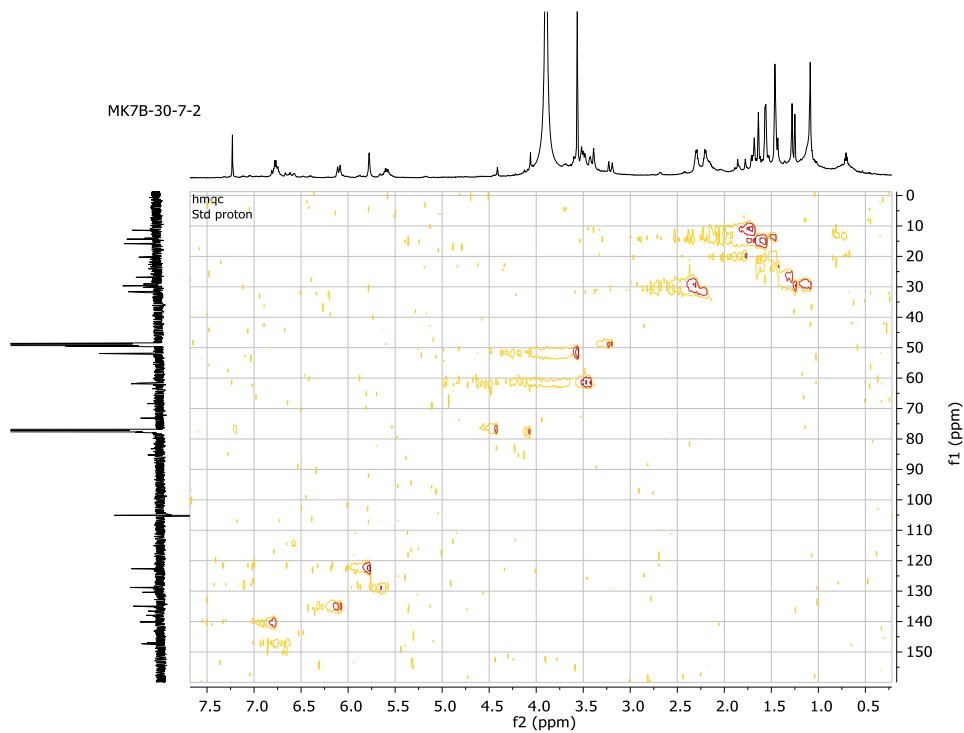

**Figure S 36:** HMQC Spectrum of compound **8** in CDCl<sub>3</sub>/methanol-*d*<sub>4</sub> (1:1)

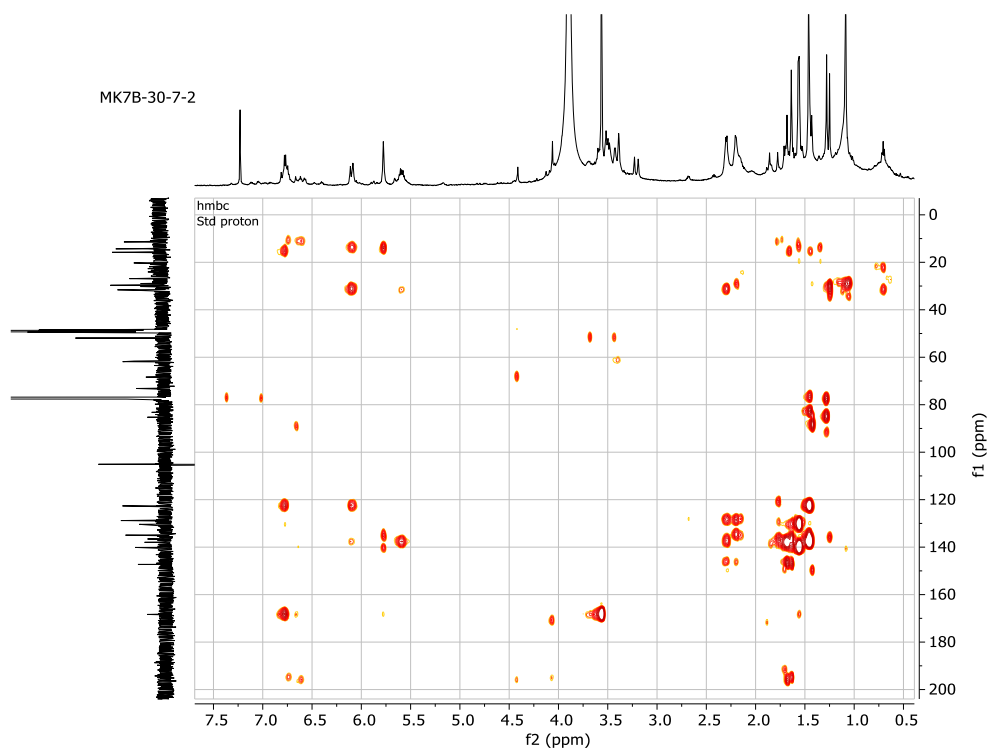

**Figure S 37:** HMBC Spectrum of compound **8** in CDCl<sub>3</sub>/methanol-*d*<sub>4</sub> (1:1)

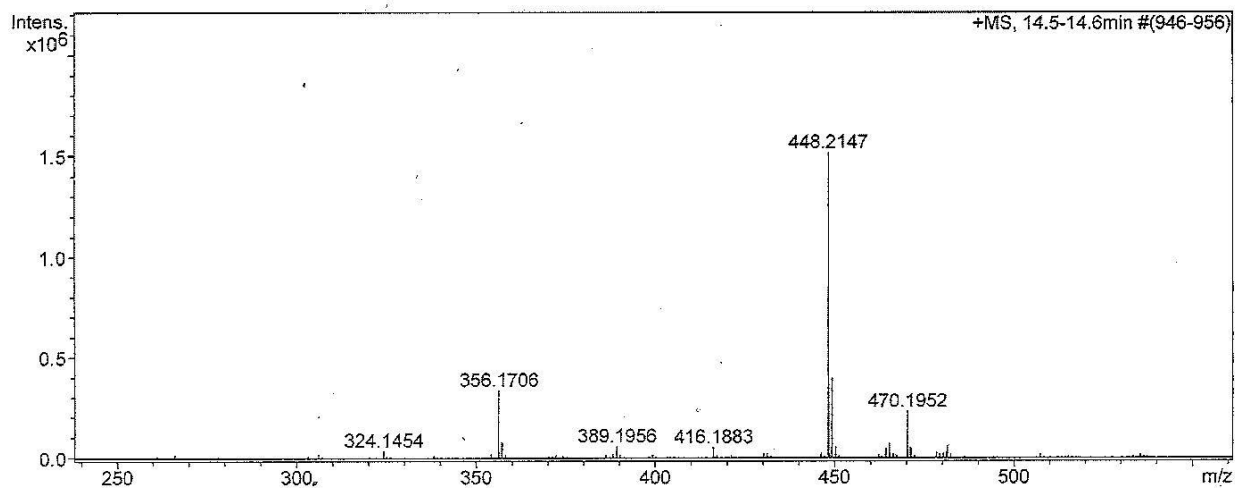

**Figure S 38:** HRMS Data of Compound **8**



**Table S1:** Best nineteen hits 100% sequence identity

|            |                                                      |
|------------|------------------------------------------------------|
| MG282093.1 | <i>Botryosphaeria dothidea</i> isolate sdx6          |
| KF551232.1 | <i>Botryosphaeria dothidea</i> strain LBSX-1         |
| JX275795.1 | <i>Botryosphaeria dothidea</i> strain SCCDHB01S      |
| JQ936677.1 | <i>Botryosphaeria dothidea</i> strain Shi Liu Branch |
| JF441086.1 | <i>Botryosphaeria dothidea</i> strain GS-02s-6       |
| HQ660460.1 | <i>Botryosphaeria dothidea</i> isolate XNHG-12WR     |
| AB454278.1 | <i>Botryosphaeria dothidea</i> isolate MUCC0039      |
| MF409167.1 | <i>Botryosphaeria dothidea</i> strain MFLUCC_17_0961 |
| KU686880.1 | <i>Botryosphaeria dothidea</i> strain MFLUCC_16_0092 |
| KU686879.1 | <i>Botryosphaeria dothidea</i> strain MFLUCC_16_0087 |
| KU686878.1 | <i>Botryosphaeria dothidea</i> strain MFLUCC_16_0085 |
| KU686877.1 | <i>Botryosphaeria dothidea</i> strain MFLUCC_16_0076 |
| JX867231.1 | <i>Botryosphaeria dothidea</i> strain JL-31          |
| JF441084.1 | <i>Botryosphaeria dothidea</i> strain HNZs-1         |
| AB645744.1 | <i>Botryosphaeria dothidea</i> strain FFPRI411066    |
| EU441944.1 | <i>Botryosphaeria dothidea</i> strain SDAU07080      |
| KM435312.1 | <i>Botryosphaeria dothidea</i> isolate Hen 1         |
| KJ530706.1 | <i>Botryosphaeria dothidea</i> strain YDJ-08         |
| FJ550211.1 | <i>Botryosphaeria dothidea</i> strain SDAU-08-73     |

**Table S2:** ITS sequences of taxa of the Botryosphaeriaceae used for alignment

|            |                                                            |
|------------|------------------------------------------------------------|
| H133917.1  | <i>Aplosporella ginkgonis</i> strain CFCC 52443            |
| MH133913.1 | <i>Aplosporella javeedii</i> strain CFCC 52439             |
| KM030581.1 | <i>Aplosporella javeedii</i> strain CFCC 89659             |
| EF564375.1 | <i>Aplosporella prunicola</i> strain STE-U 6326            |
| EF564376.1 | <i>Aplosporella prunicola</i> strain STE-U 6327            |
| KY173388.1 | <i>Aplosporella sophorae</i> strain CPC 29688              |
| KX235306.1 | <i>Barriopsis archontophoenicis</i> strain MFL UCC 14-1164 |
| KF766149.1 | <i>Barriopsis fusca</i> strain CBS 174.16                  |
| FJ919663.1 | <i>Barriopsis iraniana</i> strain IRAN1448C                |
| FJ919667.1 | <i>Barriopsis iraniana</i> strain IRAN1450C                |
| MG282093.1 | <i>Botryosphaeria dothidea</i> isolate sdx6                |
| KF551232.1 | <i>Botryosphaeria dothidea</i> strain LBSX-1               |
| JX275795.1 | <i>Botryosphaeria dothidea</i> strain SCCDHB01S            |
| GU251174.1 | <i>Dichomera eucalypti</i> strain PD294                    |
| AY744379.1 | <i>Dichomera saubinettii</i> strain CBS990 70              |
| GU251222.1 | <i>Dichomera versiformis</i> strain PD295                  |
| AY744376.1 | <i>Dichomera versiformis</i> strain WAC15208               |
| GQ923860.1 | <i>Diplodia malorum</i> strain CAP266                      |
| EF445346.1 | <i>Diplodia mutila</i> strain STE-U 5824                   |
| EF445341.1 | <i>Diplodia pinea</i> strain STE-U 5809                    |
| KF500479.1 | <i>Diplodia quercivora</i> strain PL1345                   |
| MH863064.1 | <i>Dothidotthia symphoricarpi</i>                          |
| KX228269.1 | <i>Dothiorella acacicola</i> strain CPC 26349              |
| KT240287.1 | <i>Dothiorella eriobotryae</i> isolate BN-81               |
| KY797637.1 | <i>Dothiorella guttulata</i> strain MFLUCC 17-0242         |
| FJ481601.1 | <i>Dothiorella iberica</i> strain B33                      |
| EF445361.1 | <i>Dothiorella viticola</i> strain STE-U 5831              |
| EF445360.1 | <i>Dothiorella viticola</i> strain STE-U 6139              |
| AY819725.1 | <i>Fusicoccum arbuti</i> isolate UAMH 6800                 |
| AY819724.1 | <i>Fusicoccum arbuti</i> isolate UW13                      |
| AY853214.1 | <i>Fusicoccum quercus</i> strain CBS 115298                |
| MH290868.1 | <i>Guignardia ardisiae</i> strain VDL2                     |
| MK299126.1 | <i>Guignardia cryptomeriae</i> isolate LWU 27              |
| MH935065.1 | <i>Guignardia gaultheriae</i> isolate SO1 T29 L3A 2        |
| FJ538334.1 | <i>Guignardia musicola</i> strain CBS 123405               |
| KF206174.1 | <i>Guignardia rhodora</i> strain CBS 901.69                |
| JN692544.1 | <i>Guignardia sansevieriae</i> CBS:120428                  |
| MH396638.1 | <i>Guignardia</i> sp. strain PM011                         |
| KT151806.1 | <i>Lasiodiplodia brasiliense</i> strain IBL415             |

|             |                                                            |
|-------------|------------------------------------------------------------|
| KT154762.1  | <i>Lasiodiplodia caatinguensis</i> strain IBL40            |
| KJ638320.1  | <i>Lasiodiplodia exigua</i> strain BL186                   |
| KP822975.1  | <i>Lasiodiplodia iranensis</i> strain CERC2032             |
| EU520120.1  | <i>Macrophoma sophoricola</i> isolate NW623                |
| KP017858.1  | <i>Macrophoma</i> sp. IK-2015 strain IR-3Sa-2-3-3          |
| KJ183691.1  | <i>Macrophoma</i> sp. LYZ2007                              |
| AB541378.1  | <i>Macrophoma sugi</i> strain: M1-4                        |
| KP179222.1  | <i>Macrophoma theicola</i> strain UPA-62                   |
| KY680345.1  | <i>Macrophomina phaseolina</i> strain CCTU1656             |
| KU058940.1  | <i>Macrophomina phaseolina</i> strain CDA1100              |
| KF951718.1  | <i>Macrophomina phaseolina</i> strain CPC 21421            |
| KU058950.1  | <i>Macrophomina pseudophaseolina</i> strain CD A1110       |
| AY194467.1  | <i>Natrassia mangiferae</i> strain CMW 10332               |
| KP165429.1  | <i>Neodeightonia licuriensis</i> strain COAD1780           |
| KU940110.1  | <i>Neodeightonia microspora</i> strain MFLUCC 11-0483      |
| MK203813.1  | <i>Neodeightonia palmicola</i> isolate FAFU002             |
| JX456475.1  | <i>Neodeightonia phoenicum</i> isolate FK6                 |
| KX646359.1  | <i>Neodeightonia rattanicola</i> voucher MFLUCC15-0319     |
| EU375516.1  | <i>Neofusicoccum australe</i> isolate JL619                |
| JX513628.1  | <i>Neofusicoccum brasiliense</i> strain CMM128             |
| KP860870.1  | <i>Neofusicoccum kwambonambiense</i> strain CMW42349       |
| KP860867.1  | <i>Neofusicoccum luteum</i> strain CMW41220                |
| KX464197.1  | <i>Neofusicoccum parvum</i> culture CBS:257.77             |
| KX464196.1  | <i>Neofusicoccum</i> sp. CBS 118100 culture-CBS:118100     |
| EF445351.1  | <i>Neofusicoccum vitifusiforme</i> strain STE-U 5910       |
| MH791087.1  | <i>Neoscytalidium dimidiatum</i> isolate A1F               |
| EU597630.1  | <i>Neoscytalidium dimidiatum</i> strain MCCL 340001        |
| EF570499.1  | <i>Neoscytalidium dimidiatum</i> strain UAMH 10614         |
| JQ927342.1  | <i>Neoscytalidium hyalinum</i> strain CMM3616              |
| GU172400.1  | <i>Neoscytalidium novaehollandiae</i> strain WAC13275      |
| AY343384.1  | <i>Othia spiraeae</i> strain imi63581                      |
| EU520165.1  | <i>Phaeobotryon cupressi</i> isolate NW568B                |
| EU673336.1  | <i>Phaeobotryon mamane</i> strain CPC 12445                |
| NR 155669.1 | <i>Phaeobotryon negundinis</i> MFLUCC 15-0436              |
| KM030585.1  | <i>Phaeobotryon rhois</i> strain CFCC 89663                |
| KF766146.1  | <i>Phaeosphaeria ammophilae</i> strain CBS 114595          |
| KY775577.1  | <i>Phaeosphaeriaceae</i> sp. AM-2017a voucher MFLU 17-0498 |
| MH857214.1  | <i>Phomatosphaeropsis pinicola</i>                         |
| EU683671.1  | <i>Phyllosticta capitalensis</i> strain 1095(12)           |
| FJ538339.1  | <i>Phyllosticta capitalensis</i> strain CBS 117118         |

|             |                                                          |
|-------------|----------------------------------------------------------|
| FJ538340.1  | <i>Phyllosticta capitalensis</i> strain CBS 119720       |
| EF585520.1  | <i>Pseudofusicoccum adansoniae</i> strain BRIP 19782     |
| NR 155641.1 | <i>Pseudofusicoccum artocarpi</i> CPC 22796              |
| EU144056.1  | <i>Pseudofusicoccum kimberleyense</i> strain CBS122059   |
| MG386028.1  | <i>Saccharata acaciae</i> culture CBS:143167             |
| NR 155851.1 | <i>Saccharata banksiae</i> CPC 27698                     |
| EU552129.1  | <i>Saccharata capensis</i> culture-collection CBS:122694 |
| KY173450.1  | <i>Saccharata daviesiae</i> strain CPC 29174             |
| KY173454.1  | <i>Saccharata hakeae</i> strain CPC 29250                |
| HM107423.1  | <i>Thyrostroma carpophilum</i> isolate edith             |
| KC815898.1  | <i>Thyrostroma carpophilum</i> isolate WcB7              |
| KX228249.1  | <i>Thyrostroma compactum</i> strain CBS 487.71           |
